# Supplementary material
Source: HighWire-hosted journal article supplement (https://adc.bmj.com/content/102/11/1004)
Supplement: inline-supplementary-material-1 [file inline-supplementary-material-1.docx]

**Supplementary Table One** Local guidelines for investigations in children with early developmental impairment and costs over time frame of study

| **Blood samples**  Full blood count £3.75  Zinc protoporphyrin / haematimics £13.79  Renal function £3.47  Liver function £3.47  Thyroid function £5.94  Bone profile (calcium and phosphate) £3.45  Plasma amino acids £82.00*  Biotinidase £53.00*  Creatine kinase (boys only) £3.41  Lead level £15*  Chromosome (pre 2012 - £120) or microarray (post 2012) £300.00*  Fragile X if suspected by family history £80.00*  **Urine samples**  Organic acids £82.00*  Glycosaminoglycans (if older than three months) £20.00*  **Total cost of all tests on our guideline:** £669.28  **Other recommendations (not studied in this article)**  Audiology referral  Ophthalmology referral – not mandatory, to consider if concerns  **Magentic resonance imaging under general anaesthetic** (not part of guideline but performed in 55% of cases and found to have high yield) £932.00* |
| --- |

*Costs incurred to a district general hospital for test (as few hospitals seeing children with EDI have metabolic laboratories. All other, unasterisked, costs are local prices)

**Supplementary table 2:** Summary of genetic diagnoses made

| **Diagnostic microarray results** |
| --- |
| - Chromosome 1p36,13 deletion (3 cases) - Chromosome 1q21 deletion - Chromosome 1q21 duplication - Chromosome 2p25 deletion - Chromosome 2p16 deletion - Chromosome 2q deletion - Chromosome 4q33 deletion - Chromosome 5q23 deletion (two cases) - Chromosome 5q from q34 to q35 - Chromosome 5 microdeletion - Chromosome 7q11 deletion - Chromosome 7q35 deletion - Chromosome 7p22 duplication - Chromosome 10 duplication with breakpoints within q22.3 and q23.31 - Chromosome 11 deletion with breakpoints q14.1 and q22.1 - Chromosome 11p15 duplication - Chromosome 12 duplication with breakpoints q14.1 and q15 - Chromosome 13q12 deletion - Chromosome 15q11 deletion (four cases) - Chromosome 15q13 deletion (four cases) - Chromosome 15q11 deletion - Chromosome 15 microduplication (three cases) - Chromosome 16p11 duplication (three cases) - Chromosome 16p13 duplication - Chromosome 17q21 deletion - Chromosome 17 duplication with breakpoints q11.1 and q12 - Chromosome 17q12 duplication - Deletion of short arm of chromosome 18 - Chromosome 18q22 deletion - Chromosome 22q11 duplication - Chromosome 22q13 deletion - Chromosome 22q13 deletion - Chromosome Xq26 deletion - Chromosome Xq24 deletion including UBE2a gene - Chromosome 22q11 duplication - Duplication long arm X chromosome including PLP1 gene - Duplication of X chromosome Xq28 (2 cases) |
| **Single gene or clinical diagnoses** |
| Bardet Biedl Syndrome - 5 cases  Neurofibromatosis type 1 - 3 cases  SLC2A1 (GLUT1) mutation - 2 cases  Rett Syndrome - 1 case  Angelman syndrome - 1 case  Kabuki syndrome - 2 cases (1 genetic, 1 clinical)  Cornelia de Lange syndrome - 1 case  Kleefstra syndrome - 1 case  Creatine transport deficiency - 1 case  RYR1 mutation – 1 case  ASPM microcephaly mutation - 1 case  UBE2A mutation - 1 case  PHGDH mutation - 1 case  CASK1 mutation - 1 case  COL4A1 mutation - 1 case  SLC9A6 mutation - 1 case  NRXN1 mutation - 1 case  PLP1 (Pelizaeus-Merzbacher disease) - 1 case  DGUOK (mitochondrial depletion) mutation - 1 case  SLC7A7 mutation (lysinuric protein intolerance) - 1 case  PDHA1 mutation (pyruvate dehydrogenase deficiency) - 1 case  SLC6A8 mutation (creatine transport deficiency) - 1 case  ETHE1 mutation (ethylmalonic aciduria) - 1 case  Tetrasomy 18p - 1 case  Sotos syndrome (clinical diagnosis) - 1 case  Odho symdrome (clinical diagnosis) - 1 case  Atypical ataxia telangiectasia (clinical diagnosis, gene negative) - 1 case  Fetal alcohol syndrome - 1 case |

**Supplementary figure one:** a) The frequency with which additional features were seen in participants; b) the proportion of children with a diagnosis according to additional features; c) the proportion of children with a diagnostic microarray according to additional features; d) the proportion of children with a diagnostic MRI according to additional features
